# Supplementary material
Source: PubMed Central journal article supplement (PMC2772699)

**Figure S1.** Effects of 5-AZC on virus particle production. 293T cells were transfected with the HIV-1 vector and HIV Env expression plasmid. Forty-eight hrs posttransfection, cell culture supernatants were collected and used for the detection of the HIV capsid protein using a p24 ELISA . Data represent the mean  $\pm$  SD of 3 independent experiments.

Figure S1  
Dapp et. al.

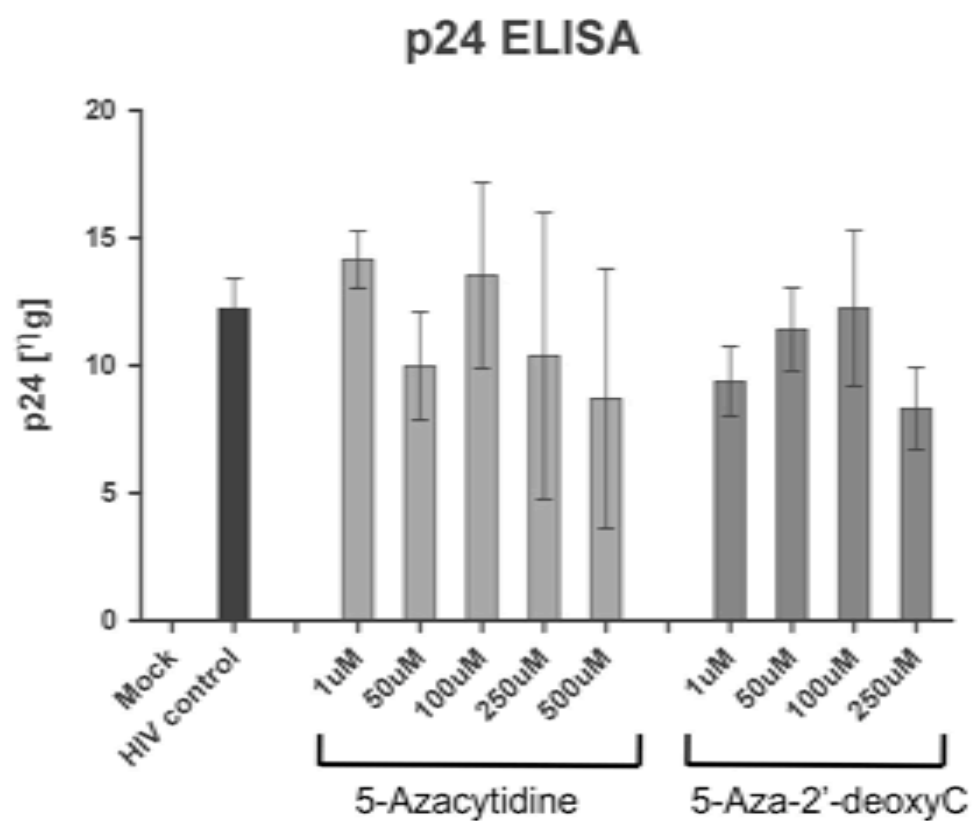

Supplement: supp_83_22_11950__1.pdf [file supp_83_22_11950__1.pdf]
